# Supplementary material for: Sarm1 Deletion, but Not WldS, Confers Lifelong Rescue in a Mouse Model of Severe Axonopathy
Source: PubMed Central journal article supplement (PMC5640801; doi:10.1016/j.celrep.2017.09.027), 2017-10-03
Supplement: mmc1.pdf [file mmc1.pdf]

Cell Reports, Volume 21

## Supplemental Information

### ***Sarm1* Deletion, but Not *Wld<sup>S</sup>*, Confers Lifelong Rescue in a Mouse Model of Severe Axonopathy**

**Jonathan Gilley, Richard R. Ribchester, and Michael P. Coleman**

| cross                                                         | viable offspring (>P10)      |            |      |
|---------------------------------------------------------------|------------------------------|------------|------|
|                                                               | Genotype                     | Obs.       | Exp. |
| $Nmnat2^{+/gtE};Wld^{S/S}$<br>x<br>$Nmnat2^{+/gtE};Wld^{S/S}$ | $Wld^{S/S}$                  | <b>67</b>  | 68.5 |
|                                                               | $Nmnat2^{+/gtE};Wld^{S/S}$   | <b>144</b> | 137  |
|                                                               | $Nmnat2^{gtE/gtE};Wld^{S/S}$ | <b>63</b>  | 68.5 |

$\chi^2$  test  $p = 0.660$

| cross                                                             | viable offspring (>P10)        |           |       |
|-------------------------------------------------------------------|--------------------------------|-----------|-------|
|                                                                   | Genotype                       | Obs.      | Exp.  |
| $Nmnat2^{+/gtE};Sarm1^{-/-}$<br>x<br>$Nmnat2^{+/gtE};Sarm1^{-/-}$ | $Sarm1^{-/-}$                  | <b>32</b> | 31.25 |
|                                                                   | $Nmnat2^{+/gtE};Sarm1^{-/-}$   | <b>61</b> | 62.5  |
|                                                                   | $Nmnat2^{gtE/gtE};Sarm1^{-/-}$ | <b>32</b> | 31.25 |

$\chi^2$  test  $p = 0.965$

**Table S1. Mendelian ratios of viable offspring from  $Nmnat2^{+/gtE};Wld^{S/S}$  and  $Nmnat2^{+/gtE};Sarm1^{-/-}$  crosses (updated). Related to Figure 1.**

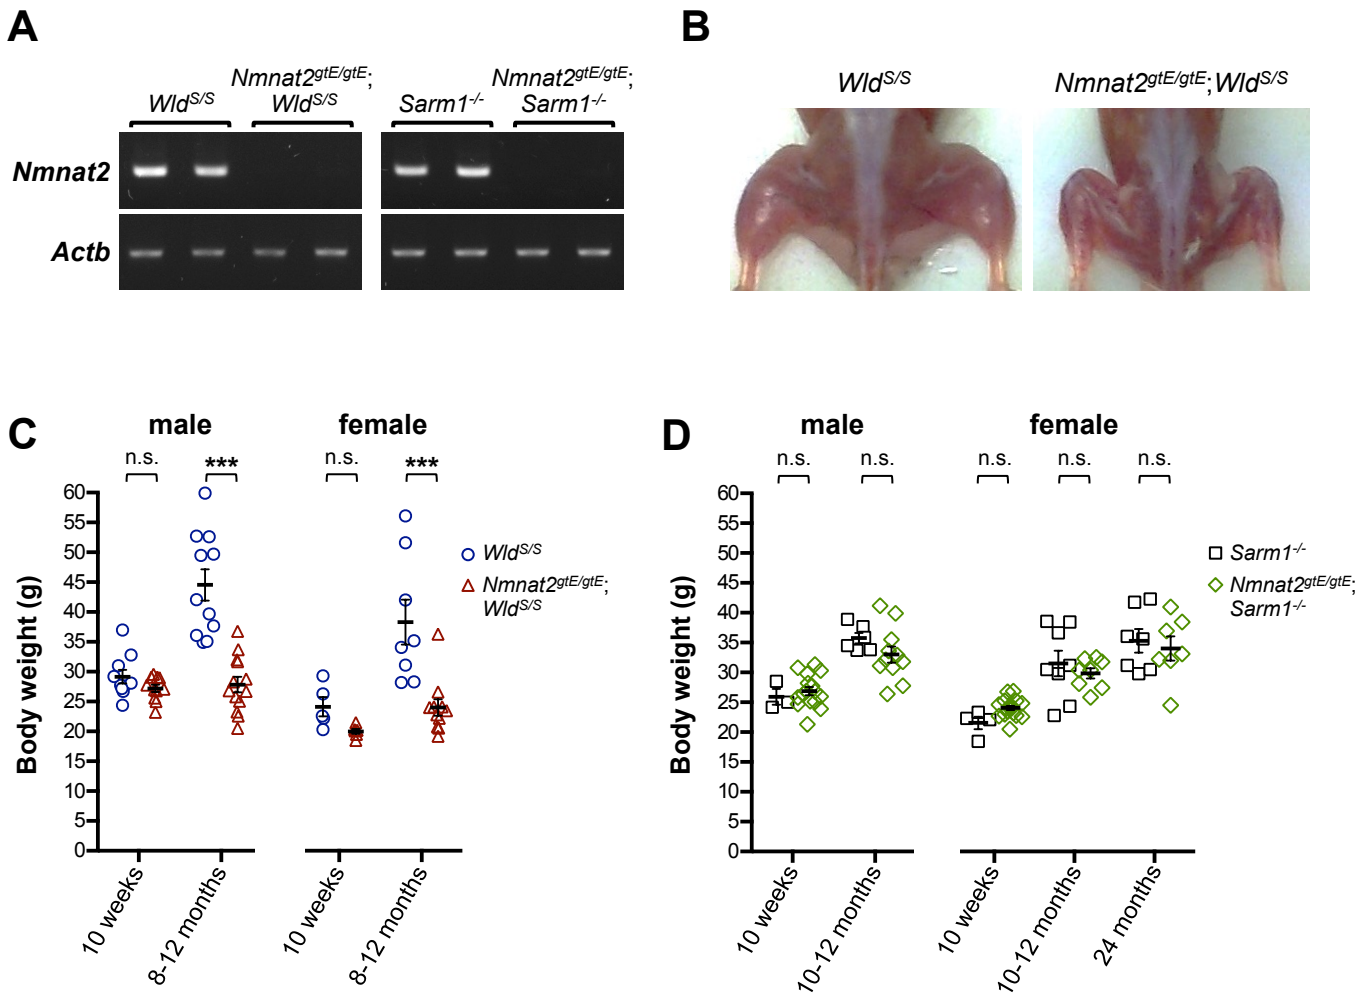

**Figure S1. Muscle atrophy and an absence of weight gain in *Nmnat2*<sup>gtE/gtE</sup>;*Wld*<sup>S/S</sup> mice but not *Nmnat2*<sup>gtE/gtE</sup>;*Sarm1*<sup>-/-</sup> mice. Related to Figure 1. (A) RT-PCR analysis of *Nmnat2* mRNA levels in brains of 10 to 12-month-old mice of the indicated genotypes. *Actb* acts as a sample reference. Images are representative of  $n = 3$  mice per genotype. Cycle numbers were adjusted for *Nmnat2* detection such that band intensity is close to saturation for the *Wld*<sup>S/S</sup> and *Sarm1*<sup>-/-</sup> control samples to emphasize the relative absence of *Nmnat2* mRNA in the *Nmnat2*<sup>gtE/gtE</sup>;*Wld*<sup>S/S</sup> and *Nmnat2*<sup>gtE/gtE</sup>;*Sarm1*<sup>-/-</sup> samples. (B) Widespread hindlimb muscle wasting in *Nmnat2*<sup>gtE/gtE</sup>;*Wld*<sup>S/S</sup> mice relative to matched *Wld*<sup>S/S</sup> controls. Representative 6-month-old female mice are shown but the phenotype invariably develops from 3-5 months onwards in both male and female *Nmnat2*<sup>gtE/gtE</sup>;*Wld*<sup>S/S</sup> mice. (C and D) Body weights of male and female *Wld*<sup>S/S</sup> and *Nmnat2*<sup>gtE/gtE</sup>;*Wld*<sup>S/S</sup> mice (C) and *Sarm1*<sup>-/-</sup> and *Nmnat2*<sup>gtE/gtE</sup>;*Sarm1*<sup>-/-</sup> mice (D) at the indicated ages. Individual values with means  $\pm$  SEM are plotted (n.s. not significant [ $p > 0.05$ ] or \*\*\* $p < 0.001$  in two-way ANOVA with Bonferroni's multiple comparisons, separate tests for males and females).**

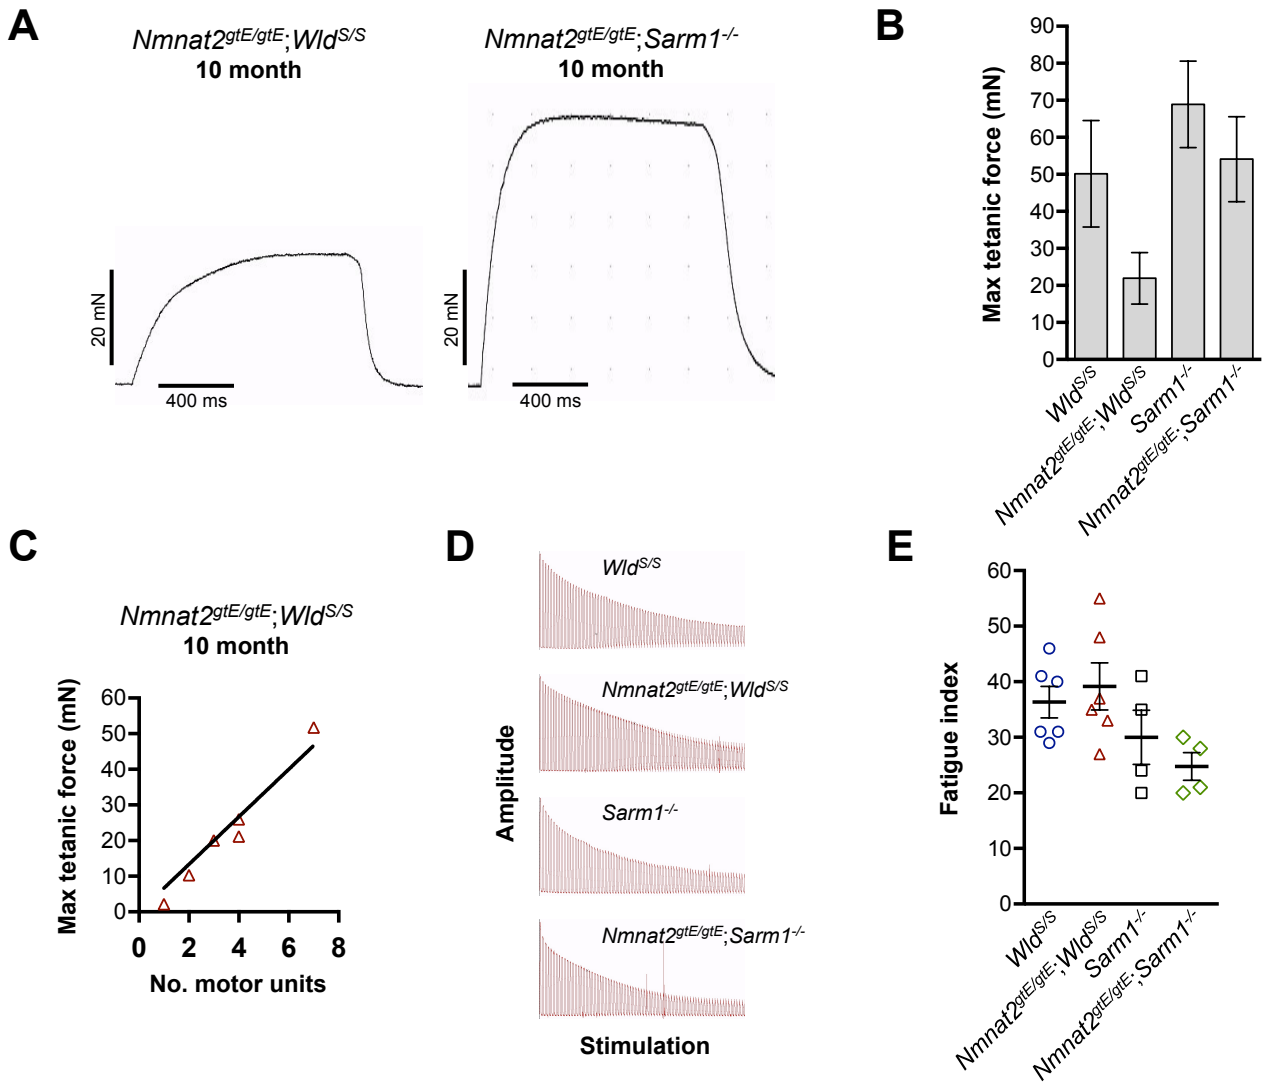

**Figure S2. Motor unit numbers are reduced in 10 month *Nmnat2<sup>gtE/gtE</sup>;Wld<sup>S/S</sup>* FDB muscles but remaining units function normally. Related to Figure 2.** (A) Representative maximum tetanic tension response (50 Hz stimulation for 1 s) of FDB muscle preparations from 10-month-old male *Nmnat2<sup>gtE/gtE</sup>;Wld<sup>S/S</sup>* and *Nmnat2<sup>gtE/gtE</sup>;Sarm1<sup>-/-</sup>* mice. (B) Maximum tetanic force of FDB muscles from 10-month-old male mice of the genotypes listed. Data are mean  $\pm$  SEM ( $n = 6$  muscles from three mice, except for  $n = 4$  muscles from two *Sarm1<sup>-/-</sup>* mice). *Nmnat2<sup>gtE/gtE</sup>;Wld<sup>S/S</sup>* force is noticeably reduced compared to the other genotypes due to reduced numbers of motor units (Fig. 3E), although substantial intra-genotype variation means that group sizes are not sufficient for statistical significance (one-way ANOVA,  $p > 0.05$ ). (C) Correlation between (reduced) numbers of motor units in *Nmnat2<sup>gtE/gtE</sup>;Wld<sup>S/S</sup>* FDB muscle explants and maximum tetanic force. Spearman correlation  $r = 0.986$  ( $p = 0.0056$ ). This suggests that, although different numbers of motor units remain in individual 10-month-old *Nmnat2<sup>gtE/gtE</sup>;Wld<sup>S/S</sup>* FDB muscles, those that are present are similar in size. (D) Representative fatigue profiles of FDB muscle explants of the four genotypes studied (as indicated) elicited by 50 Hz tetanic stimulation for 3 s, at intervals of 5 s (gaps between each tetanus were clipped). (E) Fatigue resistance of FDB muscle explants for 10-month-old mice of the genotypes listed. Individual values with means  $\pm$  SEM are plotted (same groups sizes as in B). The index of fatigue resistance is the stimulus number that produced a tetanic force equal to 50% of the initial force. Fatigueability of *Nmnat2<sup>gtE/gtE</sup>;Wld<sup>S/S</sup>* and *Nmnat2<sup>gtE/gtE</sup>;Sarm1<sup>-/-</sup>* FDB muscles is not significantly different from matched *Wld<sup>S/S</sup>* or *Sarm1<sup>-/-</sup>* controls (one-way ANOVA,  $p > 0.05$ ). However, grouping muscles based on *Wld<sup>S/S</sup>* or *Sarm1<sup>-/-</sup>* status (i.e. excluding *Nmnat2* status) suggests genetic background does influence fatigueability ( $t$  test for *Wld<sup>S/S</sup>* and *Nmnat2<sup>gtE/gtE</sup>;Wld<sup>S/S</sup>* versus *Sarm1<sup>-/-</sup>* and *Nmnat2<sup>gtE/gtE</sup>;Sarm1<sup>-/-</sup>*,  $p = 0.0126$ ).
